# Supplementary material for: Introducing ammonium salt into hole transporting materials for perovskite solar cells
Source: Royal Society of Chemistry journal article supplement (doi:10.1039/d0cc04485g), 2020-01-01
Supplement: d0cc04485g1.pdf [file d0cc04485g1.pdf]

## Supporting Information

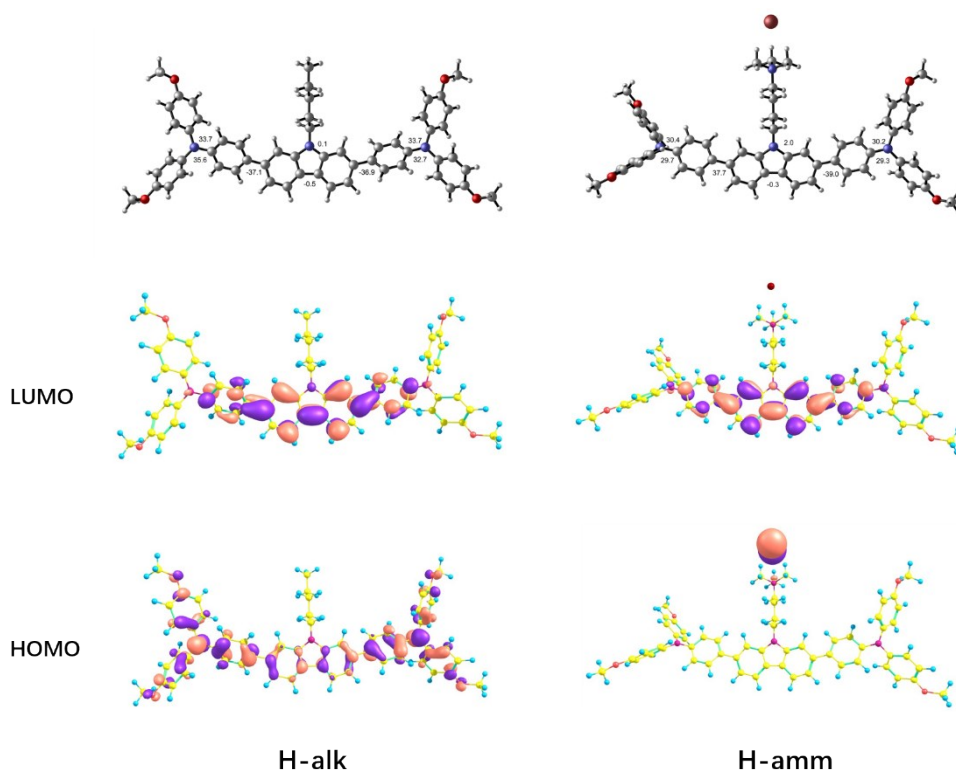

**Fig. S1** Optimized geometrical structures, electronic density distributions of HOMO and LUMO of **H-alk** and **H-amm**.

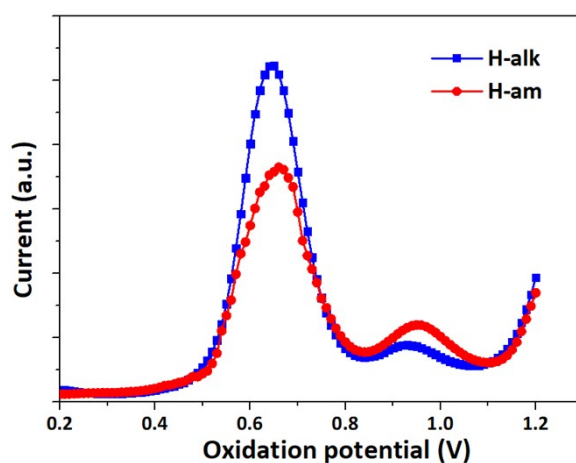

**Fig. S2** Differential pulse voltammetry curves of **H-alk** and **H-amm**.

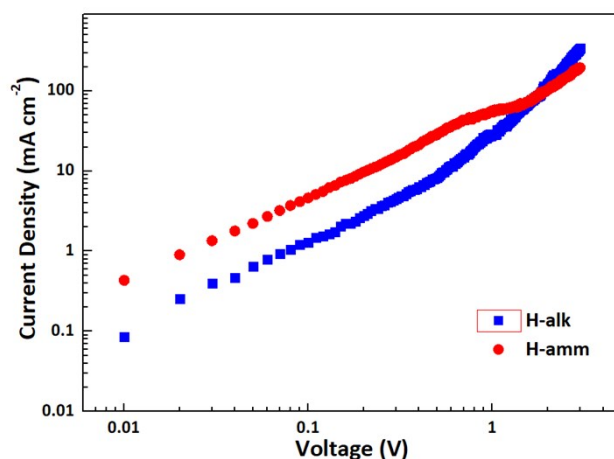

**Fig. S3**  $J$ - $V$  curves obtained from the hole-only ITO/PEDOT:PSS/HTM/Au device.

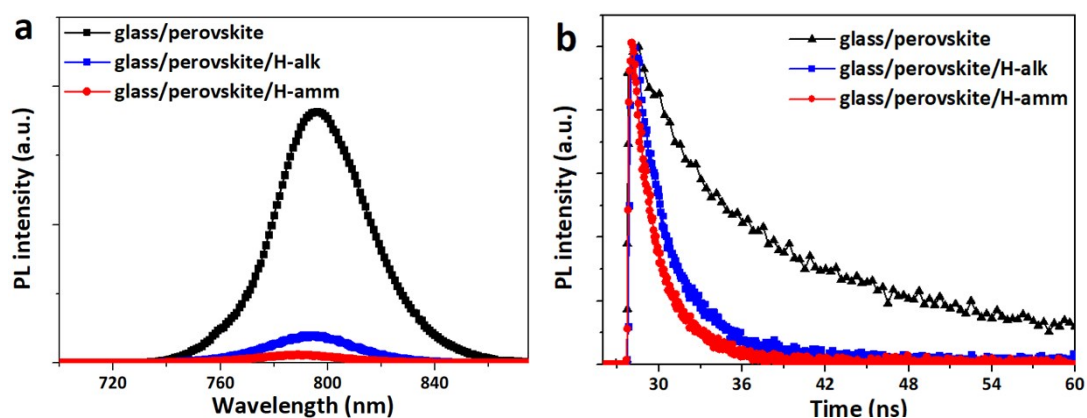

**Fig. S4** Photoluminescence spectrum of perovskite film and perovskite/HTM bilayer, and (b) corresponding time-resolved photoluminescence.

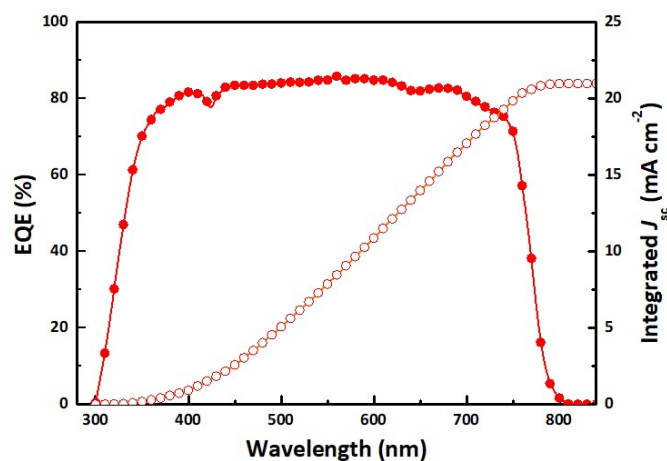

**Fig. S5** incident photo-to-current conversion efficiency (IPCE) spectra of the best-performing device with **H-amm** as HTM.

**Table S1** Mean values with the standard deviation of photovoltaic parameters of the PSCs with different HTMs. Each group contains 10 independent samples

| HTM          | $V_{oc}$ (V)    | $J_{sc}$ ( $\text{mA cm}^{-2}$ ) | FF (%)        | PCE (%)          |
|--------------|-----------------|----------------------------------|---------------|------------------|
| <b>H-alk</b> | $1.07 \pm 0.01$ | $21.46 \pm 0.26$                 | $75 \pm 0.97$ | $17.02 \pm 0.44$ |

|              |           |            |         |            |
|--------------|-----------|------------|---------|------------|
| <b>H-amm</b> | 1.07±0.01 | 21.48±0.46 | 76±1.57 | 17.44±0.75 |
|--------------|-----------|------------|---------|------------|

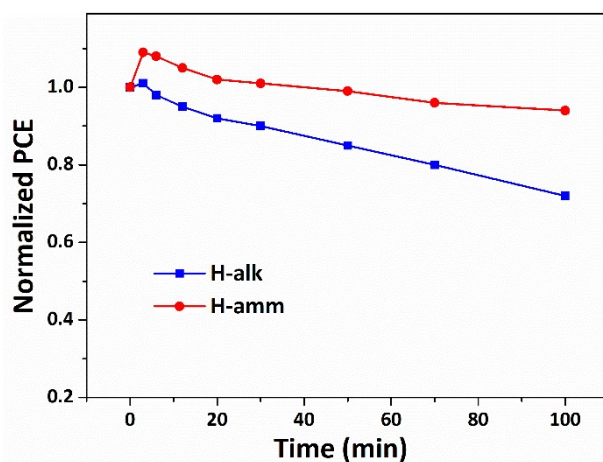

**Fig. S6** stability test with illumination.

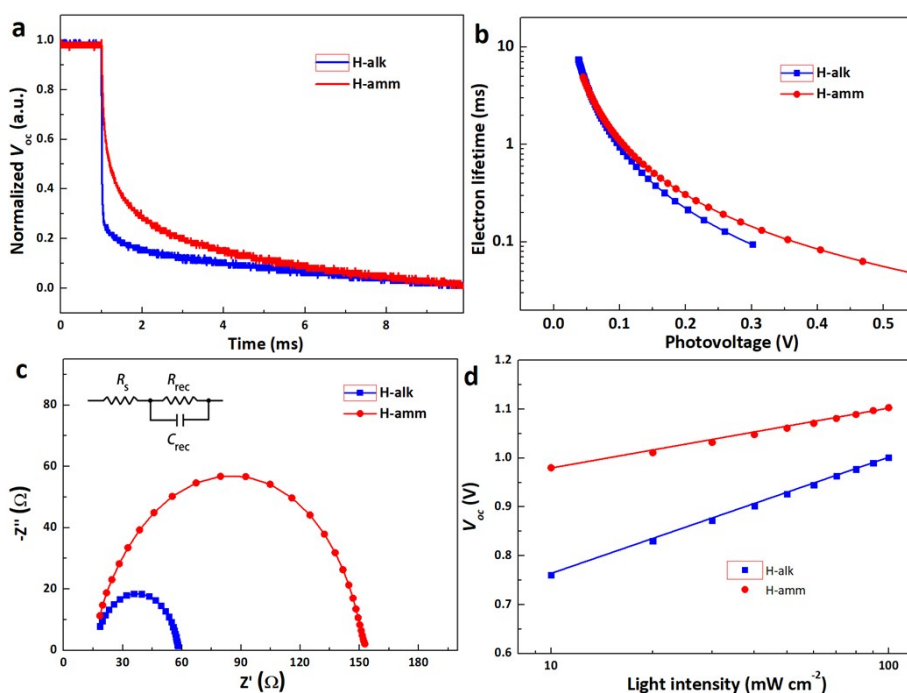

**Fig. S7** Electrochemical analysis of devices with different HTMs. (a) Transient photovoltage decay curves. (b) Extracted lifetime of the injected carriers versus photovoltage. (c) Nyquist plots with the equivalent circuit. (d)  $V_{oc}$  dependence upon light intensity.

## Synthesis

All reagents and chemicals are purchased from Sigma-Aldrich, TCI, Alfa or Sinopharm Chemical Reagent Co., et al. All chemicals are used as received without further processing unless otherwise noted. Compound **3** and compound **4** are prepared in our lab referring to previous literature.

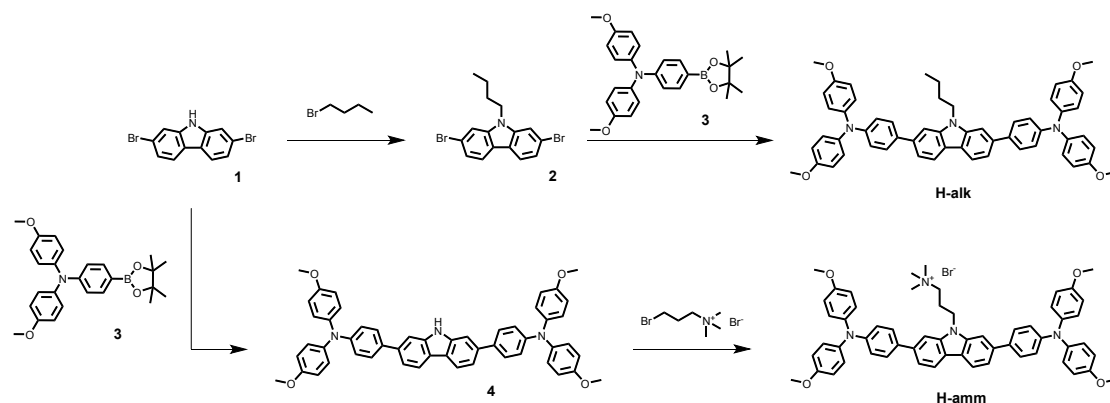

**Scheme S1.** Synthetic routes for **H-alk** and **H-amm**.

### Compound 2

2,7-dibromo-9H-carbazole (1 mmol, 0.325 g),  $K_2CO_3$  (5 mmol, 0.7 g), 15 mL DMF were added into a 50 mL flask and stirred at room temperature for 30 min under Ar. Then heating the mixture system to 80 °C, 1-Bromobutane (1.85 mmol, 0.2 mL) was added to the system. The reaction solution was kept with stirring for 4 h. After cooling to R.T., the reaction mixture was poured into cold  $Na_2SO_4$  aqueous solution, then the crude product precipitates out as solid. The crude product was recrystallized from methanol to obtain compound **2** as white solid (0.30 g, 80%).  $^1H$  NMR (500 MHz, DMSO)  $\delta$  8.12 (d,  $J = 8.3$  Hz, 2H), 7.90 (d,  $J = 1.5$  Hz, 2H), 7.36 (dd,  $J = 8.3$ , 1.6 Hz, 2H), 4.39 (t,  $J = 7.2$  Hz, 2H), 1.77 – 1.55 (m, 2H), 1.42 – 1.18 (m, 2H), 0.88 (t,  $J = 7.4$  Hz, 3H).

### H-alk

Compound 2 (0.19 g, 0.5 mmol), 4-(4,4,5,5-tetramethyl-1,3,2-dioxaborolan-2-yl)-N,N-bis(4-methoxyphenyl)aniline (compound **3**, 1.2 mmol, 0.52 g), 2M solution of  $K_2CO_3$  (8 mmol, 1.1 g) in  $H_2O$ ,  $[Pd(PPh_3)_4]$  (0.05 mmol, 60 mg), DMF (20 mL) were added into a 50 mL Ar-protected flask. The reaction solution was kept with stirring at 90 °C for 12 h. After cooling to R.T., the reaction mixture was poured into cold  $Na_2SO_4$  aqueous solution, then the crude product precipitates out as solid. The crude product was purified by column chromatography ( $CH_2Cl_2/PE = 2:1$ ) to obtain **H-alk** as light green solid (0.32 g, 78%).  $^1H$  NMR (500 MHz, DMSO)  $\delta$  8.12 (d,  $J = 8.1$  Hz, 2H), 7.75 (s, 2H), 7.65 (d,  $J = 8.7$  Hz, 4H), 7.42 (d,  $J = 9.1$  Hz, 2H), 7.06 (d,  $J = 8.9$  Hz, 8H), 6.92 (dd,  $J = 18.1$ , 8.8 Hz, 12H), 4.48 (t,  $J = 6.7$  Hz, 2H), 3.76 (s, 12H), 1.78 (s, 2H), 1.35 (d,  $J = 7.7$  Hz, 2H), 0.89 (t,  $J = 7.4$  Hz, 3H).

### H-amm

Compound 4 (0.23 g, 0.3 mmol),  $K_2CO_3$  (5 mmol, 0.7 g), 15 mL DMF were added into a 50 mL flask and stirred at room temperature for 30 min under Ar. Then heating the mixture system to 80 °C, (3-bromopropyl)trimethylammonium bromide (0.5 mmol, 0.13 g) was added to the system. The reaction solution was kept with stirring for 4 h. After cooling to R.T., the reaction mixture was poured into cold  $Na_2SO_4$  aqueous solution. Then add HBr to the mixture, the crude product precipitates out as solid. The crude product was washed by methanol and petroleum ether to obtain **H-amm** as light green solid. (0.27 g, 95%).  $^1H$  NMR (500 MHz, DMSO)  $\delta$  8.16 (d,  $J = 8.1$  Hz, 2H), 7.81 (s, 2H), 7.67 (d,  $J = 8.7$  Hz, 4H), 7.46 (d,  $J = 8.2$  Hz, 2H), 7.07 (d,  $J = 8.9$  Hz, 8H), 6.93 (dd,  $J = 19.3$ , 8.8 Hz, 12H), 4.56 (t,  $J = 6.2$  Hz, 2H), 3.76 (s, 12H),

3.04 (s, 9H), 1.25 (m, 2H), 0.87 (m, 2H).

### **Device Fabrication**

The glass/ITO substrate was sequentially washed with isopropanol, acetone, distilled water and isopropanol. The sheet resistance of ITO is  $\sim 15 \Omega/\square$  and the thicknesses of glass and ITO are 0.5 mm and 140 nm, respectively. For SnO<sub>2</sub> nanoparticles films, the diluted SnO<sub>2</sub> nanoparticles solution (2.67%) was spin coated on glass/ITO substrates in ambient air, and then annealed at 150 °C for 30 min. After depositing the electron transport layer, the perovskite layer was deposited by a two-step spin coating method; first, 1.3M of PbI<sub>2</sub> in dimethylformamide (DMF) was spin coated onto the electron transport layer at 1,500 r.p.m. for 30 s, then annealed at 70 °C for 30 min; second, after the PbI<sub>2</sub> had cooled down, the mixture solution of FAI:MABr:MACl (60mg:6mg:6mg in 1ml isopropanol) was spin coated onto the PbI<sub>2</sub> at 1,500 r.p.m. for 30 s, and then the film was taken out from the glove box and annealed in ambient air (30%~40% humidity). The annealing was under either 135 °C or 150 °C for 20 min; 150 °C annealing can deliver a higher performance due to the formation of the PbI<sub>2</sub> phase in the perovskite layer. The HTM was subsequently deposited on the substrate by spin-coating at 5000 rpm for 30 s after above substrate cooling to R.T.. The HTM solution were prepared in anhydrous chlorobenzene. the concentration of HTMs is 20 mg mL<sup>-1</sup> with 8  $\mu$ L of 4-tert-butylpyridine and 15  $\mu$ L of lithium bis(trifluoromethylsulphonyl)imide (520 mg mL<sup>-1</sup> in acetonitrile). The HTM was deposited on the on ITO/SnO<sub>2</sub>/perovskite substrate by spin-coating at 3000 rpm for 30 s. Finally, a  $\sim 70$  nm thick Au counter electrode was deposited on top of above film by thermal evaporation. The active area of the device was defined by a black mask with a size of 0.09 cm<sup>2</sup> for all measurement.

### **Characterization**

<sup>1</sup>H NMR spectra were recorded on a Brücker spectrometer (400 MHz) with chemical shifts against tetramethylsilane (TMS). UV-vis spectra of investigated molecules are carried out on a UV-vis spectrophotometer (SOLID3700, Shimadzu Co. Ltd, Japan). The PL measurements of HTM and perovskite/HTM films were measured on a fluorescence detector (Hitachi F-4600, Japan). Cyclic voltammetry was tested with a CHI660d electrochemical analyzer (CH Instruments, Inc., China). A normal three electrode system was used consisting of a platinum wire counter electrode, a platinum working electrode, as well as a calomel reference electrode. Redox potential of investigated compounds was tested in DCM with 0.1 M tetrabutylammonium hexafluorophosphate with a scan rate of 50 mV s<sup>-1</sup>. The incident photon-to-current conversion efficiency (IPCE) was recorded on QE/IPCE measurement kit (Newport, USA). The moisture resistance of HTMs was measured on a contact angle tester (METATEST E3-300).
